# Supplementary material
Source: PubMed Central journal article supplement (PMC3103366)
Supplement: supp_M110.201301_jbc.M110.201301-1.pdf [file supp_M110.201301_jbc.M110.201301-1.pdf]

## **Ca<sup>2+</sup>-DEPENDENT MONOMER AND DIMER FORMATION SWITCHES CAPRI BETWEEN RasGAP AND RapGAP ACTIVITIES**

**Dai Y, et al.**

### **LEGENDS FOR SUPPLEMENTAL FIGURES AND MOVIES**

#### **Supplemental Figure 1. Wild-type and monomeric CAPRI have similar subcellular localization.**

CHO cells were co-transfected with GFP-ΔcCAPRI and RFP-CAPRI. The localization of GFP-ΔcCAPRI and RFP-CAPRI was examined using wide-field epi-fluorescence microscopy. Panels shown are representative of five independent experiments.

#### **Supplemental Figure 2. Wild-type and monomeric CAPRI translocate similarly to the plasma membrane upon histamine stimulation.**

CHO cells were co-transfected with GFP-CAPRI and RFP-ΔcCAPRI. The relative plasma membrane translocation of GFP-CAPRI and RFP-ΔcCAPRI induced by stimulation with 100 μM histamine was compared by TIRF microscopy. The black and grey traces show plasma membrane association of GFP-CAPRI and RFP-ΔcCAPRI, respectively, and each are representative of 10 cells.

**Supplemental Movie 1.** Stimulation with 100 μM histamine induces plasma membrane translocation of GFP-ΔcCAPRI and RFP-CAPRI to a similar extent and with similar dynamics when they are coexpressed in CHO cells. TIRF microscopy.

**Supplemental Movie 2.** Stimulation with 100 μM histamine induces plasma membrane translocation of RFP-ΔcCAPRI and GFP-CAPRI to a similar extent and with similar dynamics when they are coexpressed in CHO cells. TIRF microscopy.

**Supplemental Movie 3.** Stimulation with 100 μM histamine induces the plasma membrane translocation of RFP-CAPRI which causes a concomitant dissociation of GFP-RBD from the plasma membrane when GFP-RBD and RFP-CAPRI are coexpressed in CHO cells. TIRF microscopy.

**Supplemental Movie 4.** Stimulation with 100 μM histamine induces the plasma membrane translocation of RFP-ΔcCAPRI which causes a concomitant dissociation of GFP-RBD from the plasma membrane when GFP-RBD and RFP-ΔcCAPRI are coexpressed in CHO cells. TIRF microscopy.

GFP- $\Delta$ cCAPRI

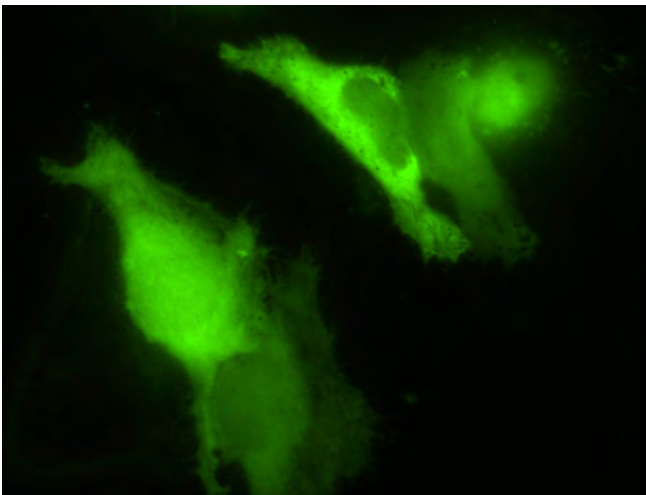

RFP-CAPRI

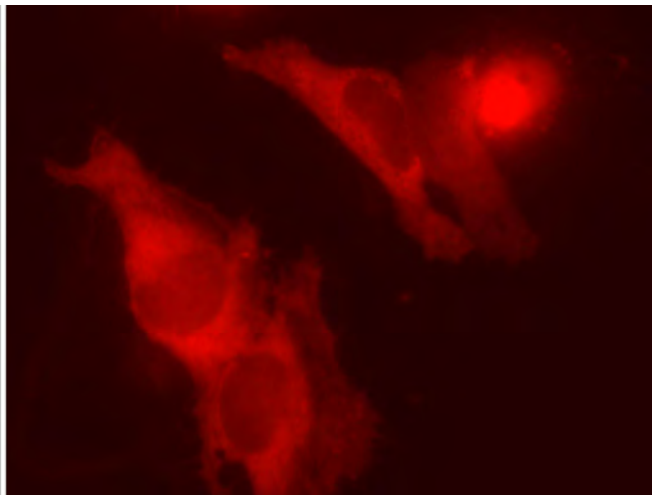

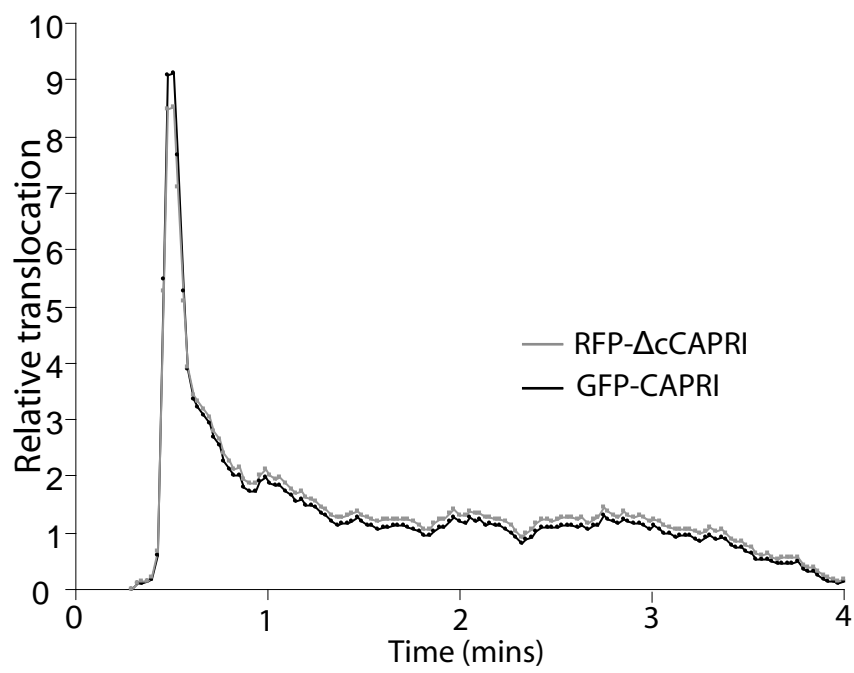

Dai et al. Suppl Figure 2
